# Supplementary material for: Controllable synthesis of large-area free-standing amorphous carbon films and their potential application in supercapacitors
Source: Royal Society of Chemistry journal article supplement (doi:10.1039/c4ra11378k), 2014-11-07
Supplement: c4ra11378k1.pdf [file c4ra11378k1.pdf]

## Electronic Supplementary Material (ESI)

### Controllable synthesis of large-area free-standing amorphous carbon films and their potential application in supercapacitors

Daming Zhu<sup>a</sup>, Yuhao Liu<sup>a</sup>, Lili Yuan<sup>a</sup>, Yi Liu<sup>b</sup>, Xiaolong Li<sup>b</sup>, Lin Yi<sup>a</sup>, Helin Wei<sup>a\*</sup>, Kailun Yao<sup>a</sup>

<sup>a</sup> School of Physics, Huazhong University of Science and Technology, Wuhan, Hubei, 430074, PR China

<sup>b</sup> Shanghai Synchrotron Radiation Facility, Shanghai Institute of Applied Physics, Chinese Academy of Sciences ,  
Shanghai , 201203 , PR China

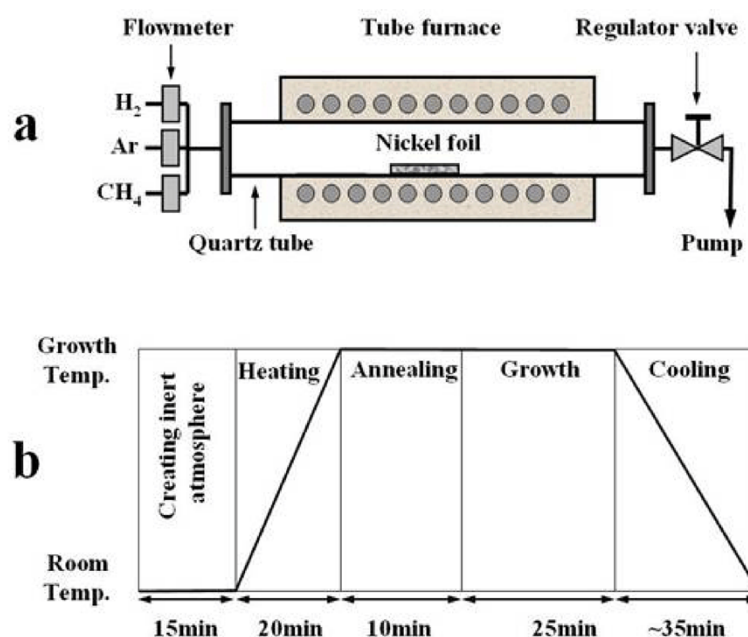

Fig. S1-Experimental set-up and process used for the synthesis of FS-ACF. (a) Schematic of APCVD system. (b) The process used for synthesis of FS-ACF: steps, synthesis time and temperature.

\*Corresponding author: Tel: +86-27-8756-1131.

E-mail address: [hlwei@hust.edu.cn](mailto:hlwei@hust.edu.cn) (H. L. Wei).

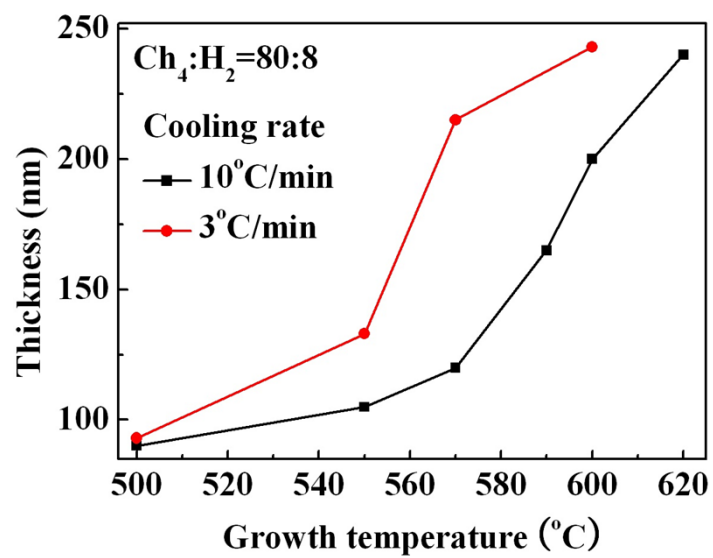

Fig. S2 - Film thickness of the FS-ACF dependence of the growth temperature and the cooling rate.

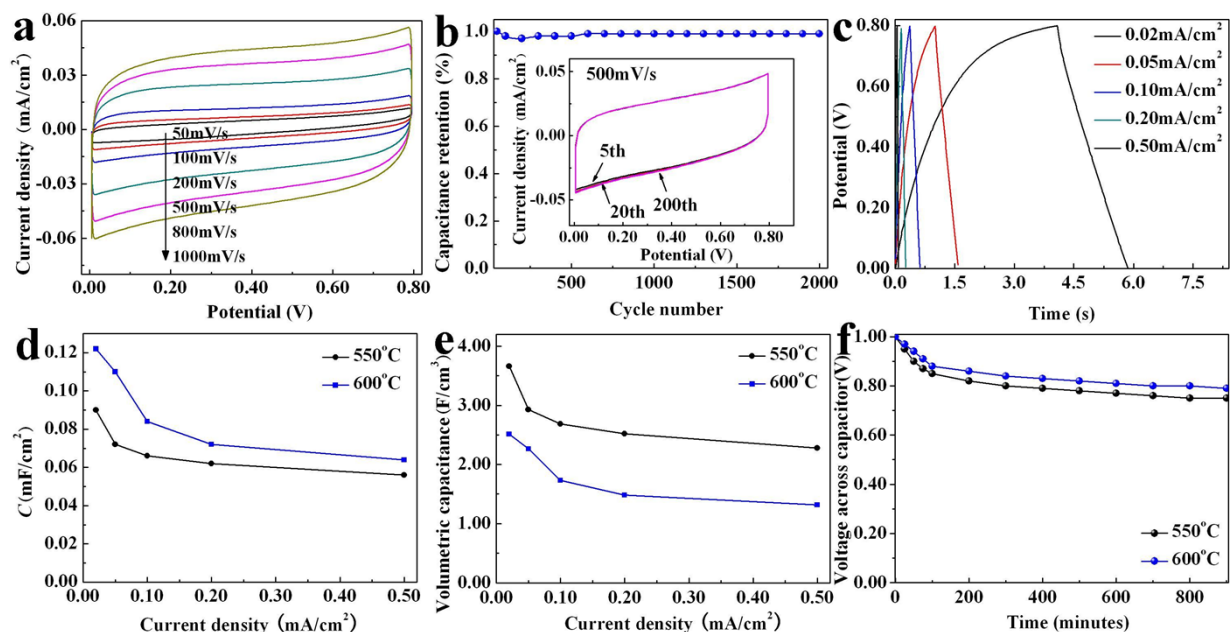

Fig. S3 - (a) CV curves of SC based on FS-ACF grown at 550°C under different scan rates. (b) Cycling stability performance of the SC based on FS-ACF grown at 600°C, inset shows several CV curves during 2000 cycles at scan rate of 500 mV/s. (c) GCD curves of SC based on the FS-ACF grown at 550°C at different current densities. (d) Area specific capacitance and (e) volumetric specific capacitance of the SCs based on the FS-ACFs calculated from the GCD curves at various current densities. (f) Self-discharge profile in two SCs based on the FS-ACFs.
